# Supplementary material
Source: PubMed Central journal article supplement (PMC3076197)
Supplement: NIHMS265483-supplement-1_si_001.pdf [file NIHMS265483-supplement-1_si_001.pdf]

Supporting Information for

**Use of 2,3,5-F<sub>3</sub>Y-β<sub>2</sub> and 3-NH<sub>2</sub>Y-α<sub>2</sub> to study PCET in  
*E. coli* Ribonucleotide Reductase**

Mohammad R. Seyedsayamdost,<sup>†,&</sup> Cyril S. Yee,<sup>†</sup> and  
JoAnne Stubbe<sup>\*,†,‡</sup>

*Department of Chemistry<sup>†</sup> and Biology<sup>‡</sup>, Massachusetts Institute of Technology, 77  
Massachusetts Avenue, Cambridge, MA 02139–4307*

*&Current address: Department of Biological Chemistry and Molecular Pharmacology, 240  
Longwood Avenue, CI-609, Boston, MA 02115*

\* To whom correspondence should be addressed. Tel: (617) 253-1814. Fax: (617) 258-7247.

E-mail: [stubbe@mit.edu](mailto:stubbe@mit.edu)

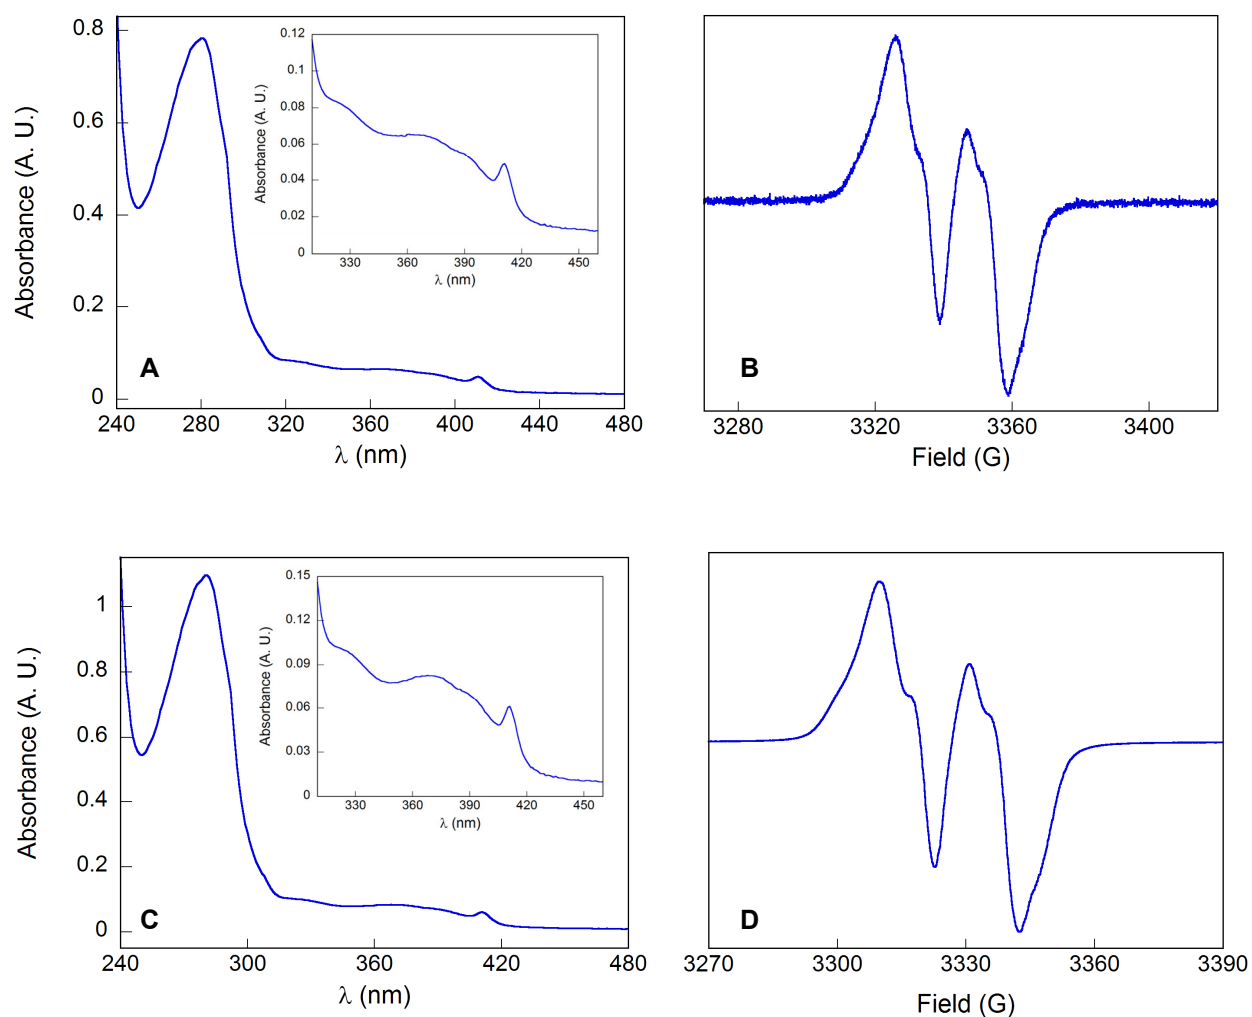

**Figure S1:** Increasing the radical content of intein wt-β2 and F<sub>3</sub>Y<sub>356</sub>-β2. UV-vis (A) and EPR (B) spectra of intein wt-β2 (1.1 Y<sub>122</sub><sup>•</sup>/dimer) after the chelation/reconstitution procedure. The inset (A) is a magnified view of the features associated with the Y<sub>122</sub><sup>•</sup> diiron cluster. UV-vis (C) and EPR (D) spectra of F<sub>3</sub>Y<sub>356</sub>-β2 (1.2 Y<sub>122</sub><sup>•</sup>/dimer) after the chelation/reconstitution procedure. The inset (C) shows a magnified view of the features associated with the Y<sub>122</sub><sup>•</sup> diiron cluster.

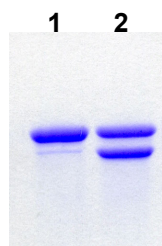

**Figure S2:** SDS PAGE analysis of  $F_3Y_{356}\text{-}\beta_2$  (lane 1, 4  $\mu\text{g}$ ) and  $F_3Y_{356}\text{-}\beta\beta'$  (lane 2, 4  $\mu\text{g}$ ) after the chelation/reconstitution procedure.

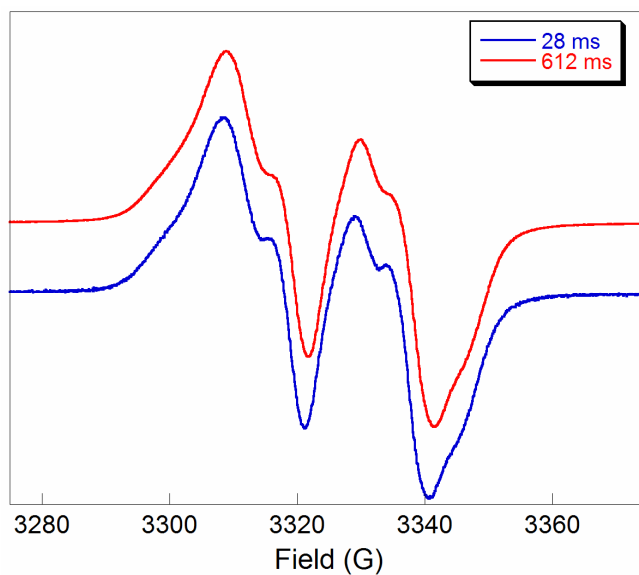

**Figure S3:** EPR spectra of the reaction of  $F_3Y_{356}\text{-}\beta_2$  with wt  $\alpha_2$  in the presence of CDP/ATP quenched after 28 ms and 612 ms. The spectra were recorded at 77 K.

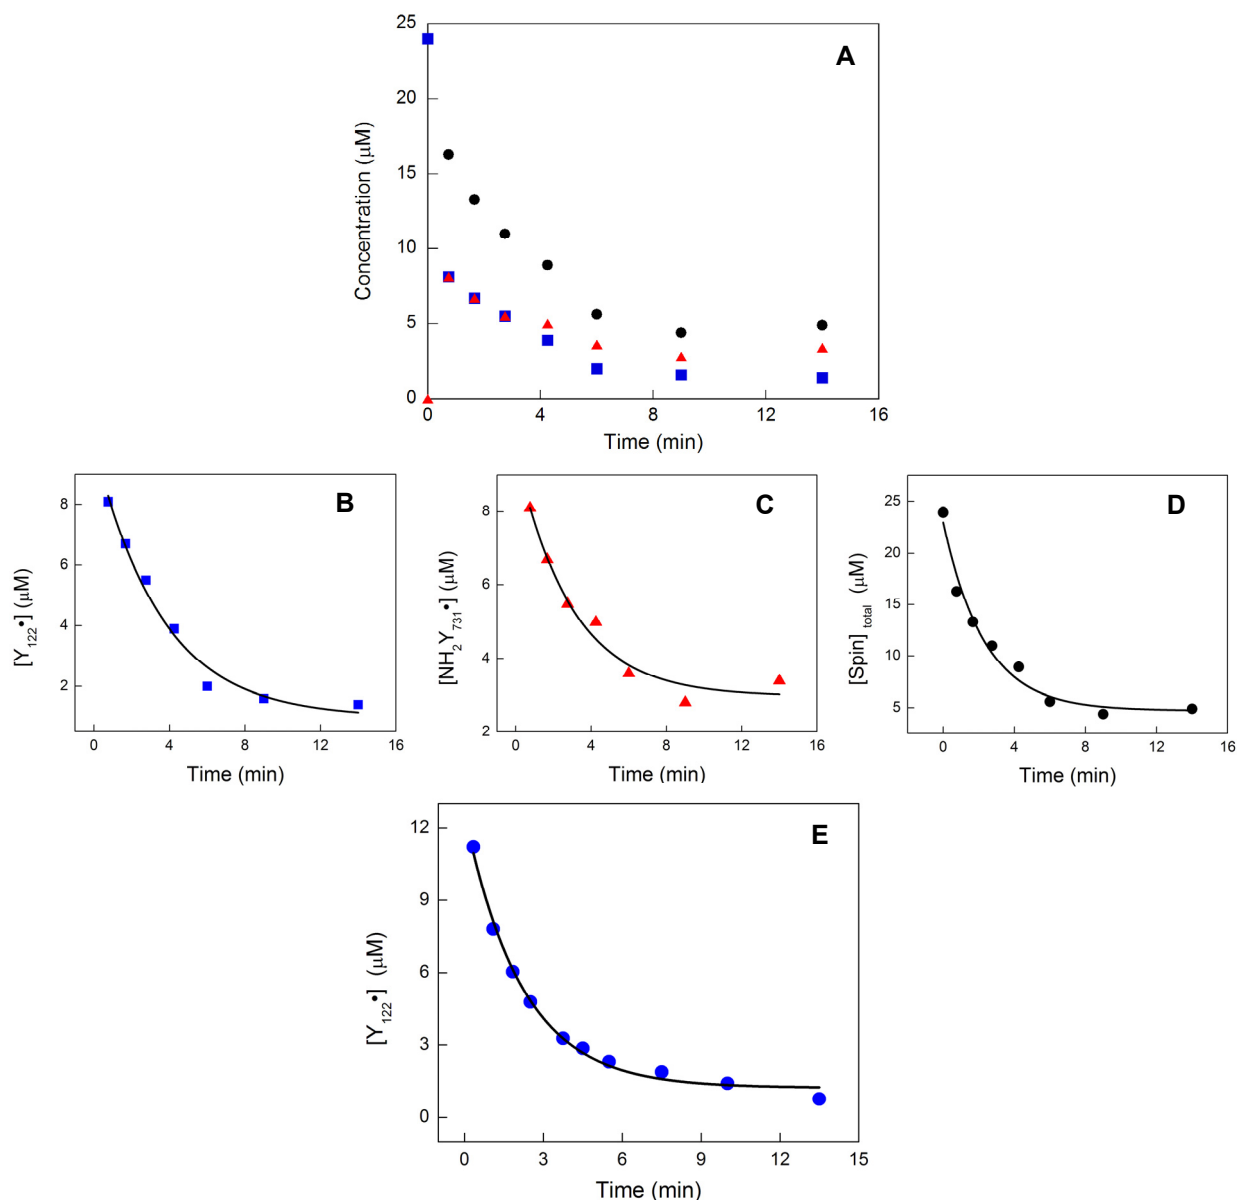

**Figure S4:** Stability of  $\text{NH}_2\text{Y}_{731}\cdot$  probed by EPR and UV-vis spectroscopy. (A)  $\text{NH}_2\text{Y}_{731}\text{-}\alpha 2$  and ATP were mixed with wt  $\beta 2$  ( $1.2 \text{ Y}_{122}\cdot / \beta 2$ ) and CDP at  $25^\circ\text{C}$  to give final concentrations of  $20 \mu\text{M}$ ,  $3 \text{ mM}$ ,  $20 \mu\text{M}$  and  $1 \text{ mM}$ , respectively. At defined time points, an aliquot was removed, transferred to an EPR tube, frozen in liquid  $\text{N}_2$  and its EPR spectrum recorded. (B-E) The analysis and fits for the data in panel (A) are shown in panels B-E. For each time point, the  $[\text{spin}]_{\text{total}}$  (black dots) and its distribution between  $\text{Y}_{122}\cdot$  (blue squares) and  $\text{NH}_2\text{Y}_{731}\cdot$  (red triangles) was determined and plotted vs. time. Time courses for  $[\text{Y}_{122}\cdot]$  (B),  $[\text{NH}_2\text{Y}_{731}\cdot]$  (C), and  $[\text{spin}]_{\text{total}}$  (D) are shown with mono-exponential fits to the data indicated by black lines. (E) Time course of  $\text{Y}_{122}\cdot$  decay measured by UV-vis spectroscopy. The reaction was carried out at  $25^\circ\text{C}$  and contained final concentrations of  $18 \mu\text{M}$   $\text{NH}_2\text{Y}_{731}\text{-}\alpha 2/\beta 2$  ( $1.2 \text{ Y}_{122}\cdot / \beta 2$ ) and  $1 \text{ mM}$  CDP and  $3 \text{ mM}$  ATP. At defined time points a UV-vis spectrum was recorded and the  $[\text{Y}_{122}\cdot]$  (blue dots) computed using the dropline method. The black line is a mono-exponential fit to the data. The fits above yield decay rate constants  $0.0057 \pm 0.0013 \text{ s}^{-1}$  for  $\text{Y}_{122}\cdot$  (B),  $0.0052 \pm 0.0017 \text{ s}^{-1}$  for  $\text{NH}_2\text{Y}_{731}\cdot$  (C),  $0.0072 \pm 0.0012 \text{ s}^{-1}$  for  $[\text{spin}]_{\text{total}}$  (D), and  $0.0065 \pm 0.0005 \text{ s}^{-1}$  for  $\text{Y}_{122}\cdot$  determined by UV-vis spectroscopy (E), giving an average decay  $k$  of  $0.0062 \pm 0.0012 \text{ s}^{-1}$ .

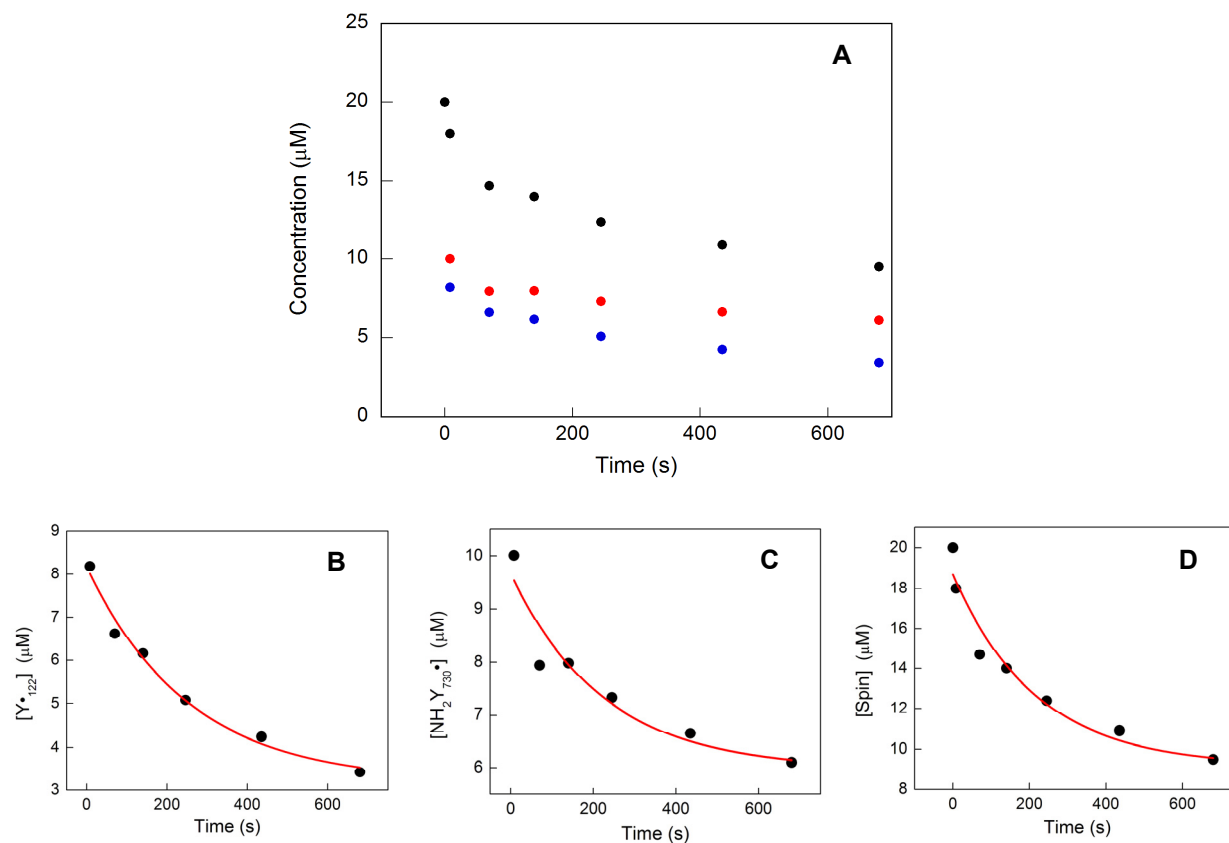

**Figure S5:** Stability of  $\text{NH}_2\text{Y}_{730}\bullet$  probed by EPR spectroscopy. (A)  $\text{NH}_2\text{Y}_{730}\text{-}\alpha 2$  and ATP were mixed with wt  $\beta 2$  ( $1.0 \text{ Y}_{122}\bullet / \beta 2$ ) and CDP at  $25^\circ\text{C}$  to give final concentrations of  $20 \mu\text{M}$ ,  $3 \text{ mM}$ ,  $20 \mu\text{M}$  and  $1 \text{ mM}$ , respectively. At defined time points, an aliquot was removed, transferred to an EPR tube, frozen in liquid  $\text{N}_2$  and its EPR spectrum recorded. (B-D) The analysis and fits for the data in panel (A) are shown in panels B-D. For each time point, the  $[\text{spin}]_{\text{total}}$  (black dots) and its distribution between  $\text{Y}_{122}\bullet$  (blue squares) and  $\text{NH}_2\text{Y}_{730}\bullet$  (red triangles) was determined and plotted vs. time. Time courses for  $[\text{Y}_{122}\bullet]$  (B),  $[\text{NH}_2\text{Y}_{730}\bullet]$  (C), and  $[\text{spin}]_{\text{total}}$  (D) are shown with mono-exponential fits to the data indicated by red lines yielding rate constants of  $0.004 \pm 0.00083 \text{ s}^{-1}$  (B) and  $0.0043 \pm 0.0015 \text{ s}^{-1}$  (C) and  $0.0045 \pm 0.0011 \text{ s}^{-1}$  (D), giving an average rate constant of  $0.0043 \pm 0.0011 \text{ s}^{-1}$ .

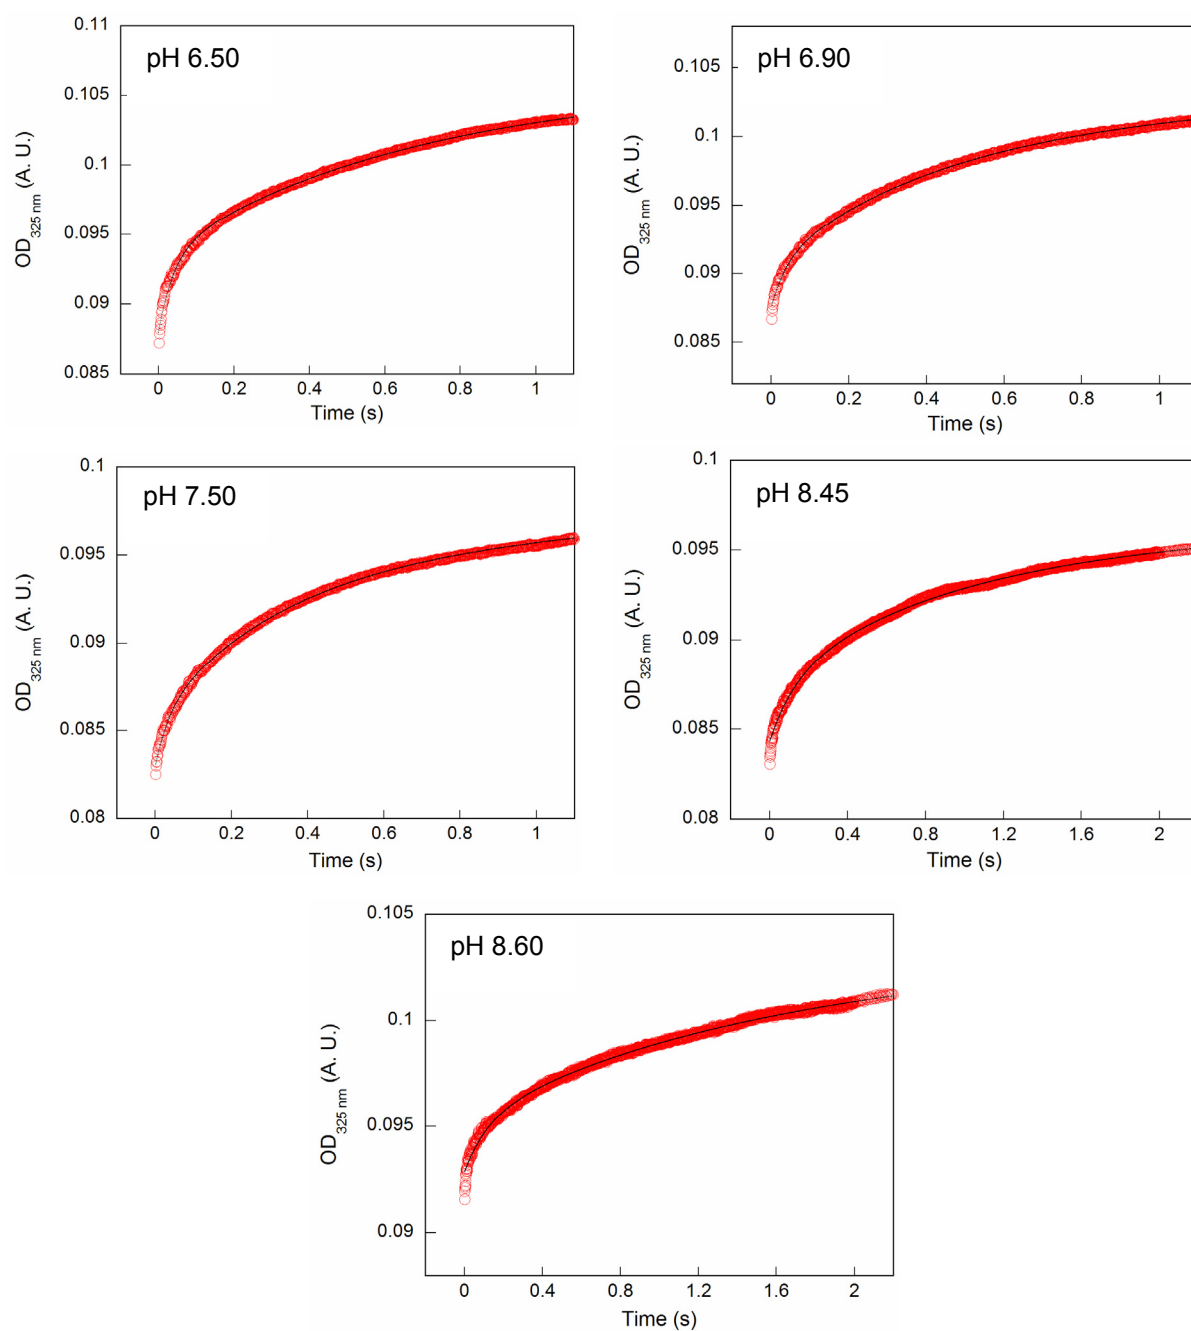

**Figure S6:** Magnified view of the initial 1-2 s of the SF UV-vis traces shown in Fig. 3 for the reaction of  $\text{NH}_2\text{Y}_{731}\text{-}\alpha 2$  with  $\text{F}_3\text{Y}_{356}\text{-}\beta 2$  in the presence of CDP/ATP.

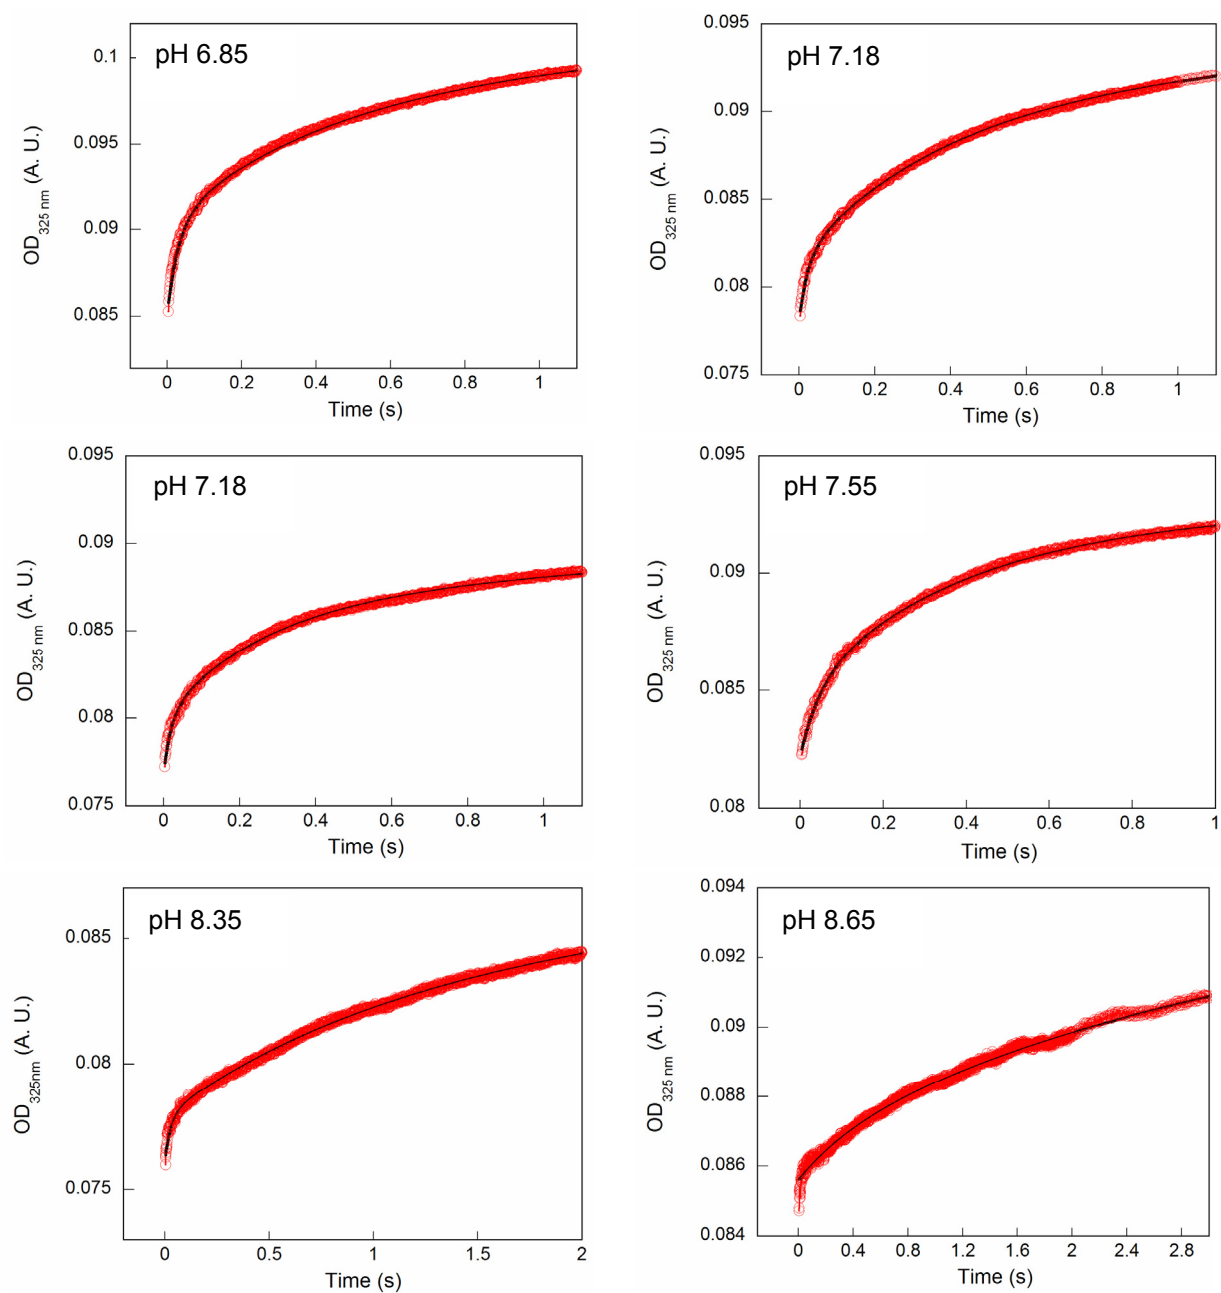

**Figure S7:** Magnified view of the initial 1-3 s of the SF UV-vis traces shown in Fig. 3 for the reaction of  $\text{NH}_2\text{Y}_{730}\text{-}\alpha 2$  with  $\text{F}_3\text{Y}_{356}\text{-}\beta 2$  in the presence of CDP/ATP.

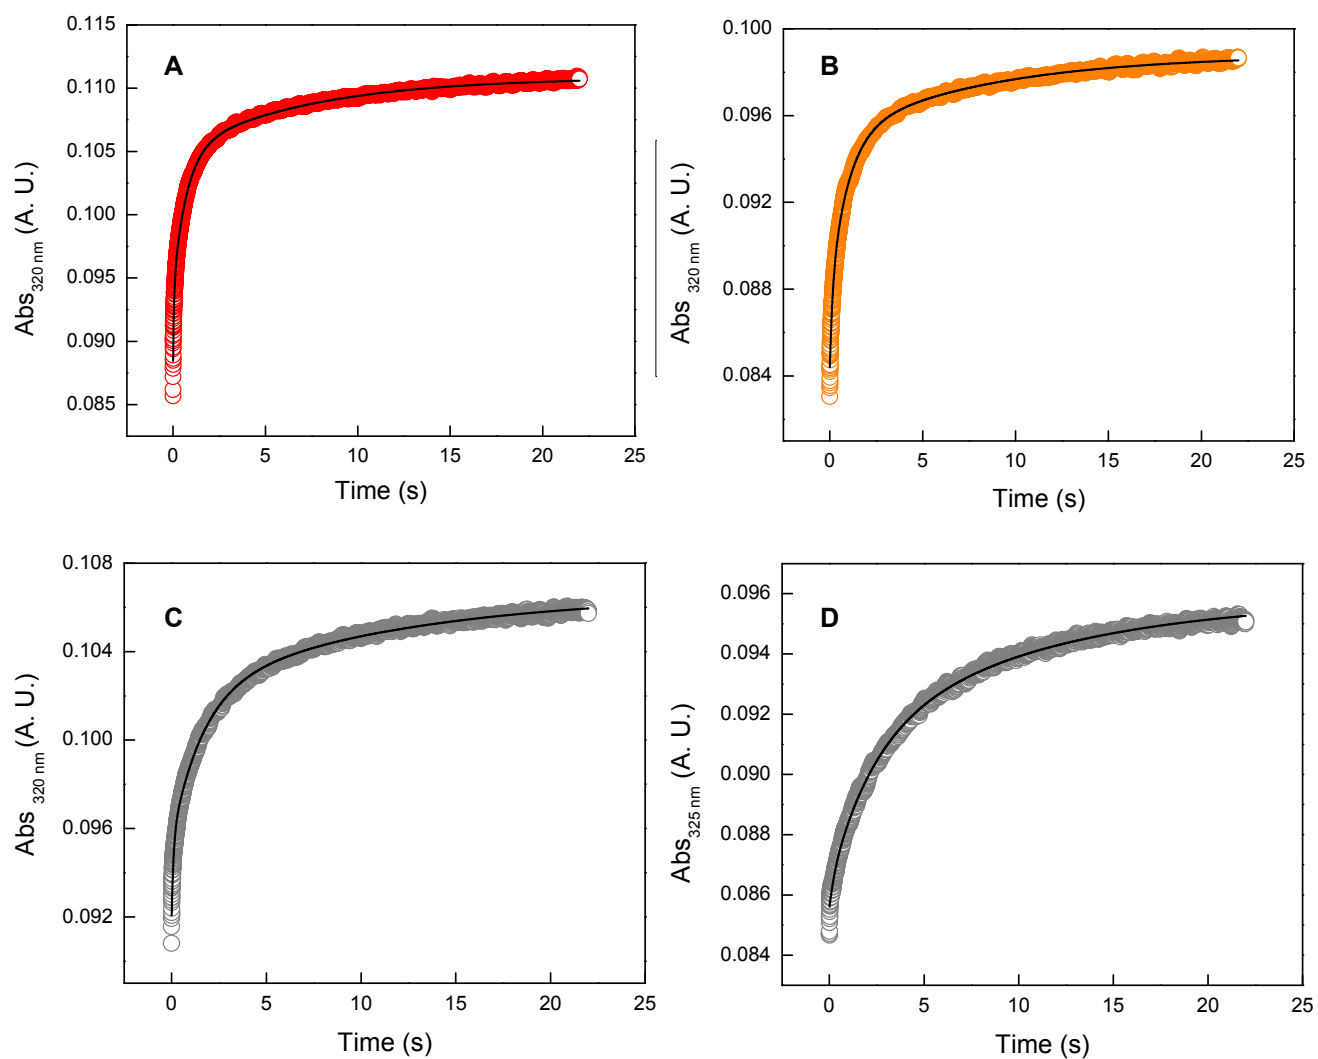

**Figure S8:** SF UV-vis reactions of  $\text{NH}_2\text{Y}_{731}\text{-}\alpha 2$  with  $\text{F}_3\text{Y}_{356}\text{-}\beta 2$  in the presence of CDP/ATP monitored over 22 s at pH 6.6 (A), 8.45 (B) and 8.60 (C). SF UV-vis reaction of  $\text{NH}_2\text{Y}_{730}\text{-}\alpha 2$  with  $\text{F}_3\text{Y}_{356}\text{-}\beta 2$  in the presence of CDP/ATP monitored over 22 s at pH 8.65 (D).



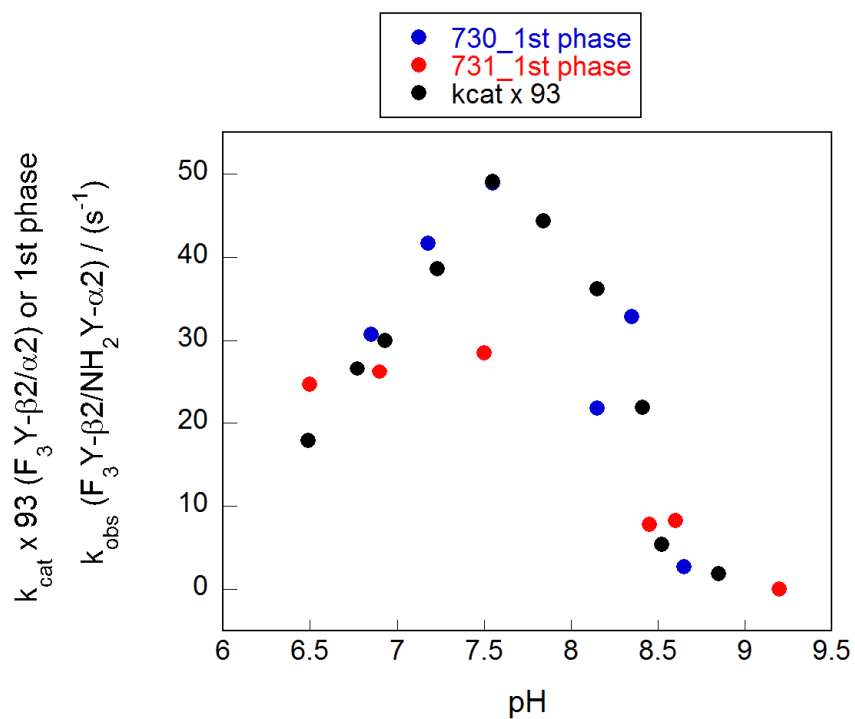

**Figure S9:** Comparison of the pH rate profiles from the first kinetic phase of  $\text{NH}_2\text{Y}\cdot$  formation vs. steady state dCDP formation. Here, the  $k_{\text{cat}}$  from the reaction of  $\text{F}_3\text{Y}\text{-}\beta 2$  and wt  $\alpha 2$  (black dots) has been multiplied by 93 to align the activity point at pH 7.6 and overlaid with the fast phase rate constant (see Fig. 4A) in the reaction of  $\text{F}_3\text{Y}\text{-}\beta 2$  with  $\text{NH}_2\text{Y}_{730}\text{-}\alpha 2$  (blue dots) or  $\text{NH}_2\text{Y}_{731}\text{-}\alpha 2$  (red dots).
